# Supplementary material for: Radiochemical Feasibility of Mixing of 99mTc-MAA and 90Y-Microspheres with Omnipaque Contrast
Source: MDPI journal article supplement (doi:10.3390/molecules27217646), 2022-11-07

**Supplementary materials**  
For  
**Radiochemical Feasibility of Mixing of  $^{99m}\text{Tc}$ -MAA and  $^{90}\text{Y}$ -Microspheres  
with Omnipaque Contrast**

Chang-Tong Yang<sup>1,2</sup>, Pei Ing Ngam<sup>1,3</sup>, Vanessa Phua Jing Xin<sup>1</sup>, Sidney Wing  
Kwong Yu<sup>1</sup>, Gogna Apoorva<sup>2,4</sup>, David Chee Eng Ng<sup>1,2\*</sup>, Hian Liang Huang<sup>1,2\*</sup>

1 Department of Nuclear Medicine and Molecular Imaging, Radiological Sciences Division,  
Singapore General Hospital, Outram Road, Singapore 169608, Singapore

2 Duke-NUS Medical School, 8 College Road, Singapore 169857, Singapore

3 Department of Diagnostic Imaging, National University Hospital Singapore, 5 Lower  
Kent Ridge Road, Singapore 119074, Singapore

4 Department of Vascular and Interventional Radiology, Radiological Sciences Division,  
Singapore General Hospital, Outram Road, Singapore 169608, Singapore

**Figure S1.** Microscopic images of sample **1**, **2**, and **4**.

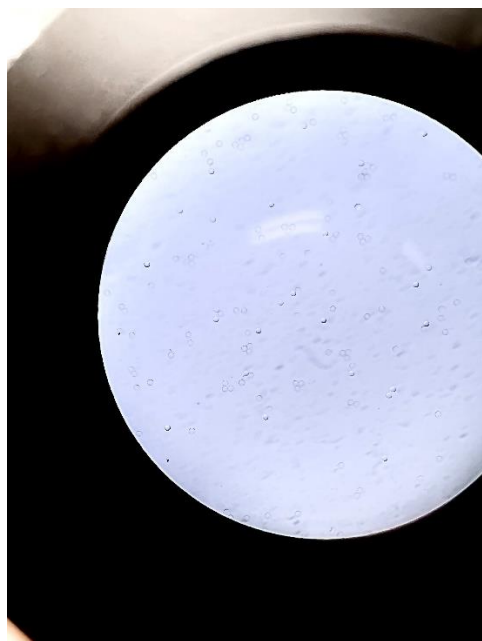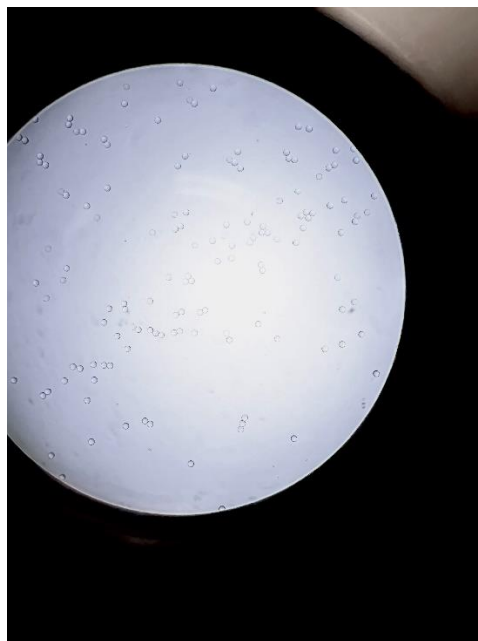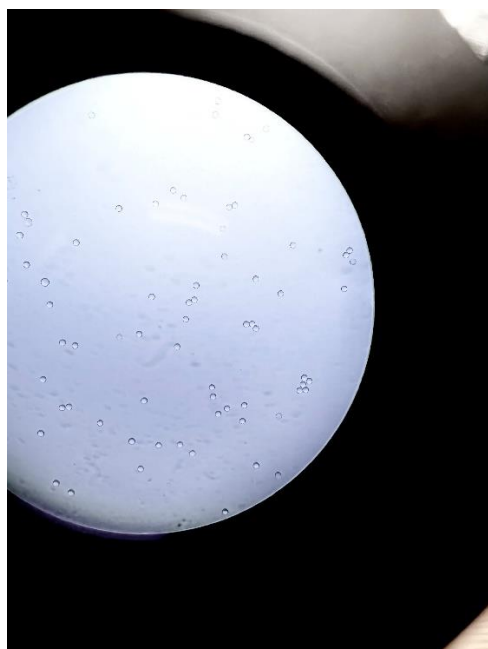

**Figure S2.** TLC chromatograms of  $^{99m}\text{Tc}$ -MAA in contrast omnipaque with same volume of serum incubated at  $37^\circ\text{C}$  at 1 hour and 3 hours, respectively. (Left) 1h, (Right) 3hs.

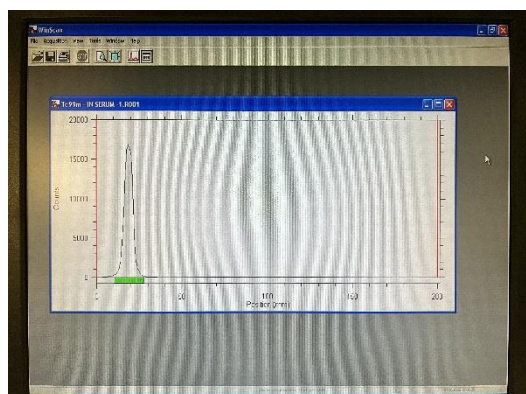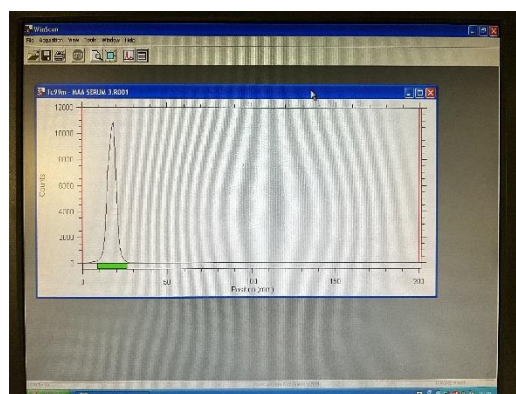

Supplement: s1 [file s1]
